# Supplementary material
Source: PubMed Central journal article supplement (PMC2941000)
Supplement: mmc1.pdf [file mmc1.pdf]

Biophysical Journal, Volume 99

Supporting Material

## **Laser-Assisted Single-Molecule Refolding (LASR)**

Rui Zhao, Myles Marshall, Elvin A. Alemán, Rajan Lamichhane, Andrew Feig,  
and David Rueda

## Supplementary Methods

**Determination of Activation Barrier from LASR experiments.** To determine transition state parameters, we begin with the assumption that, during the temperature jump, the kissing complex (KC) is in equilibrium with an activated complex ( $TS^\ddagger$ ) to form the extended duplex, similarly to Eyring's Transition State theory:

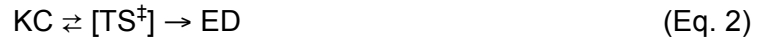

The equilibrium constant between the KC and  $TS^\ddagger$  can be defined as

$$K^\ddagger = \frac{[TS^\ddagger]}{[KC]} \quad (\text{Eq. 3})$$

Once the reactant reaches across the transition state, it proceeds to form the extended duplex. Therefore, we can estimate  $[TS^\ddagger]$  as the fraction of molecules that form the extended duplex at a given jump temperature ( $f_{ED}$ ), whereas  $[KC]$  can be estimated as the fraction of molecules that did not form the extended duplex ( $1 - f_{ED}$ ). The equilibrium constant can be rewritten as:

$$K^\ddagger = \frac{f_{ED}}{1 - f_{ED}} \quad (\text{Eq. 4})$$

Thus, (Eq. 4) can be rearranged as:

$$f_{ED} = \frac{K^\ddagger}{1 + K^\ddagger} \quad (\text{Eq. 5})$$

From the LASR melting curves (Fig. 4),  $f_{ED}$  is determined experimentally as:

$$f_{ED} = \frac{f(T) - f_0}{f_{\max} - f_0} \quad (\text{Eq. 6})$$

where  $f(T)$  is the fraction reacted at a temperature  $T$ ,  $f_0$  is the fraction reacted at low temperature and  $f_{\max}$  is the maximum fraction reacted. The fraction reacted,  $f(T)$ , can be expressed as:

$$f(T) = f_0 + (f_{\max} - f_0)f_{ED} = f_0 + (f_{\max} - f_0) \frac{K^\ddagger}{1 + K^\ddagger} \quad (\text{Eq. 7})$$

The constant,  $K^\ddagger$ , can be expressed in terms of transition state Gibbs free energy as

$$K^{\pm} = \exp\left(-\frac{\Delta G^{\pm}}{RT}\right) \quad (\text{Eq. 8})$$

The temperature dependence of  $\Delta G^{\pm}$  can be obtained using the Gibbs-Helmoltz equation,(1)

$$\Delta G^{\pm} = \Delta H_r^{\pm}(1 - T/T_r) \quad (\text{Eq. 9})$$

where  $\Delta H_r^{\pm}$  is the activation energy barrier for the refolding reaction and  $T_r$  is the refolding temperature obtained using (Eq. 1). Finally, the fraction reacted during a LASR temperature jump,  $f(T)$ , can be expressed as

$$f(T) = f_0 + (f_{\max} - f_0) \frac{e^{-\frac{\Delta H_r^{\pm}}{RT}(1-T/T_r)}}{1 + e^{-\frac{\Delta H_r^{\pm}}{RT}(1-T/T_r)}} \quad (\text{Eq. 10})$$

This expression was used to fit the LASR curves in Fig. 4 to determine the activation energy barrier of extended duplex formation. A similar expression can be derived for the dissociation reaction.

**Determination of Activation Barrier Parameters by Eyring Analysis.** The dissociation activation barrier can be obtained by measuring the temperature dependence of the kissing complex dissociation rate constants ( $k_{\text{off}}$ ) and using Eyring analysis (2). The kinetic rate constant was obtained by fitting the distribution of dwell times in the kissing complex to a single exponential decay, as previously described (3). Using a microscope stage temperature controller, the rate constants  $k_{\text{off}}$  was determined at temperatures ranging from 15 to 23 °C. At higher temperatures, the number of molecules forming the kissing complex decreased dramatically. The resulting rate constants were linearized in an Eyring's plot (Supplementary Fig. 4) and fit to Eyring's equation):

$$\ln\left(\frac{k_{\text{off}} h}{k_B T}\right) = -\frac{\Delta H_d^{\pm}}{R} \frac{1}{T} + \frac{\Delta S_d^{\pm}}{R} \quad (\text{Eq 11})$$

to obtain the activation energy barrier  $\Delta H_d^{\pm}$ .

**Supplementary Table 1.** DNA and RNA sequences used in this study.

| Name    | Description                             | Sequence <sup>1,2</sup>                                                                                                         |
|---------|-----------------------------------------|---------------------------------------------------------------------------------------------------------------------------------|
| dsDNA1  | Short duplex                            | 5'-ATC TAT AAA AAT ATA GAT-3'<br>3'-TAG ATA TTT TTA TAT CTA-5'                                                                  |
| dsDNA1' | Fluorophore labeled short duplex        | 5' Cy3-ATC TAT AAA AAT ATA GAT dT(Cy5)TTT-3' B<br>3'-TAG ATA TTT TTA TAT CTA-5'                                                 |
| dsDNA2  | Intermediate duplex                     | 5'-ATC ATC TCT CTC TAA GAT GAT-3'<br>3'-TAG TAG AGA GAG ATT CTA CTA-5'                                                          |
| dsDNA2' | Fluorophore labeled Intermediate duplex | 5' Cy3-ATC ATC TCT CTC TAA GAT GAT dT(Cy5)TTT-3' B<br>3'-TAG TAG AGA GAG ATT CTA CTA-5'                                         |
| dsDNA3  | Long duplex                             | 5'-ATT GCG ATA GAG AGA GAT CGC AAT-3'<br>3'-TAA CGC TAT CTC TCT CTA GCG TTA-5'                                                  |
| dsDNA3' | Fluorophore labeled Long duplex         | 5' Cy3-ATT GCG ATA GAG AGA GAT CGC AAT dT(Cy5)TTT-3' B<br>3'-TAA CGC TAT CTC TCT CTA GCG TTA-5'                                 |
| HP1     | RNA hairpin 1                           | 5' B-AUA ACA AGG GGA <u>A</u> AU GCC UUG U-3' Cy3                                                                               |
| HP2     | RNA hairpin 2                           | 5' Cy5-ACG AGG CAU <u>U</u> UC CCC UUG U-3'                                                                                     |
| HP3     | RNA hairpin 3                           | 5' B-AUA ACA AGG <b>G</b> <b>C</b> CU GCC UUG U-3' Cy3                                                                          |
| HP4     | RNA hairpin 4                           | 5' Cy5- <b>U</b> <b>G</b> <b>U</b> <b>U</b> <b>C</b> <b>G</b> CAU UUC <b>C</b> <b>G</b> <b>A</b> <b>G</b> <b>C</b> <b>A</b> -3' |

<sup>1</sup> B = biotin, Cy3 and Cy5 are linked to the nucleic acid by a 6-carbon amino linker.

<sup>2</sup> The underlined bases in HP1 and HP2 were also mutated to G and C, respectively.

<sup>2</sup> Bold bases in HP3 and HP4 are modifications from HP1 and HP2, respectively.

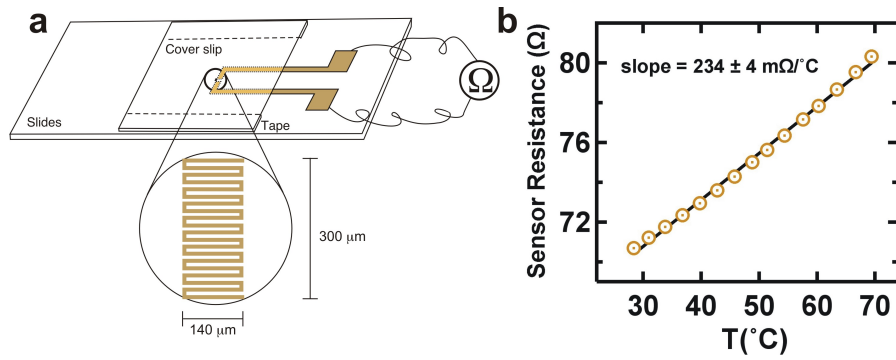

**Supplementary Figure 1. a. Micrometer-size gold sensor for temperature calibration.** The gold micro-sensor is fabricated by depositing gold onto the masked pre-cleaned glass surface. A thin layer (<1mm) of polydimethylsiloxane (PDMS) film is deposited on the sensor to insulate. Circle shows the sensor with a size of 140 x 300 μm. **b. Calibration of the micro-sensor in a temperature-controlled oven.** Gold wire sensor was placed in a temperature-controlled oven, where the temperature was increased with a step of 3°C with 5 minutes of equilibrating time. The resistance of the gold wire sensor is monitored using a multi-meter (Agilent).

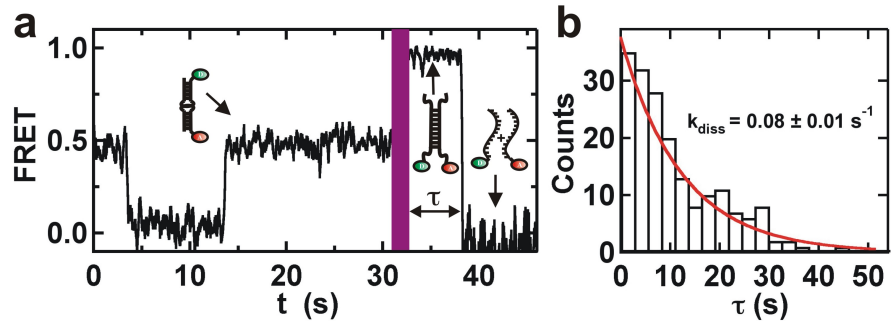

**Supplementary Figure 2.** a. FRET trajectory of transient stable duplex formation and dissociation.  $\tau$  is the dwell-time in the transient stable duplex state. b. Histogram distribution of  $\tau$ .  $k_{\text{off}}$  is obtained by fitting the distribution to an exponential decay.

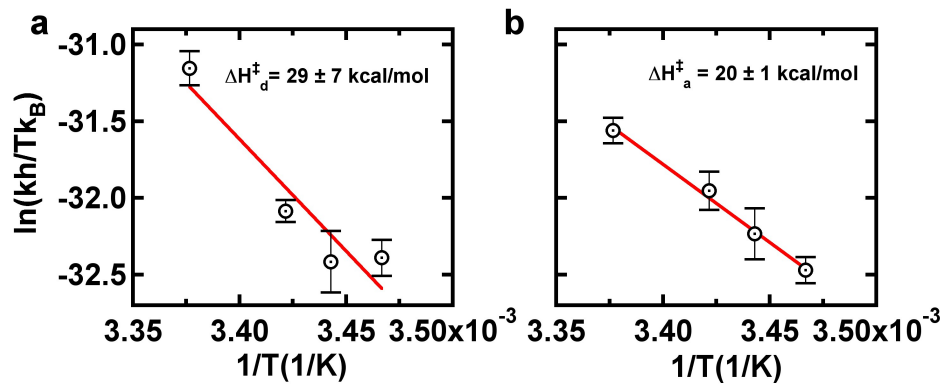

**Supplementary Figure 3.** a. Eyring analysis of the HP1 and HP2 kissing complex dissociation reaction. b. Eyring analysis of the HP1 and HP2 kissing complex association reaction.

## **Supplementary References**

1. Stancik, A. L., and E. B. Brauns. 2008. Rearrangement of partially ordered stacked conformations contributes to the rugged energy landscape of a small RNA hairpin. *Biochemistry* 47:10834-10840.
2. Fiore, J., and D. Nesbitt. 2010. Personal communication.
3. Zhao, R., and D. Rueda. 2009. RNA folding dynamics by single-molecule fluorescence resonance energy transfer. *Methods* 49:112-117.
